# Supplementary material for: Parallel transmit hybrid pulse design for controlled on‐resonance magnetization transfer in R 1 mapping at 7T
Source: PubMed Central journal article supplement (PMC11680742; doi:10.1002/mrm.30333), 2024-10-14

# Supporting Information for parallel transmit hybrid pulse design to control on-resonance magnetization transfer at 7T

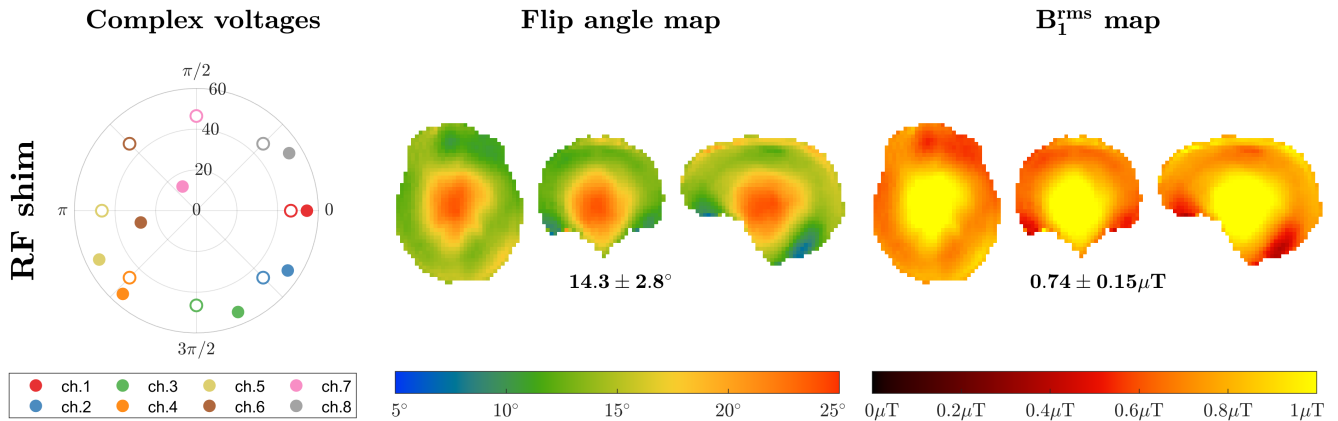

Supporting Information Figure S1: Results obtained with a magnitude least squares (MLS) RF shimming solution. Left column: polar plot with the amplitude (Volts) and phases (radians) of the MLS RF shim (filled circles), compared to those of the CP pulse (empty circles). Middle column: respective flip angle map. Right column: respective  $B_1^{\text{rms}}$  map.

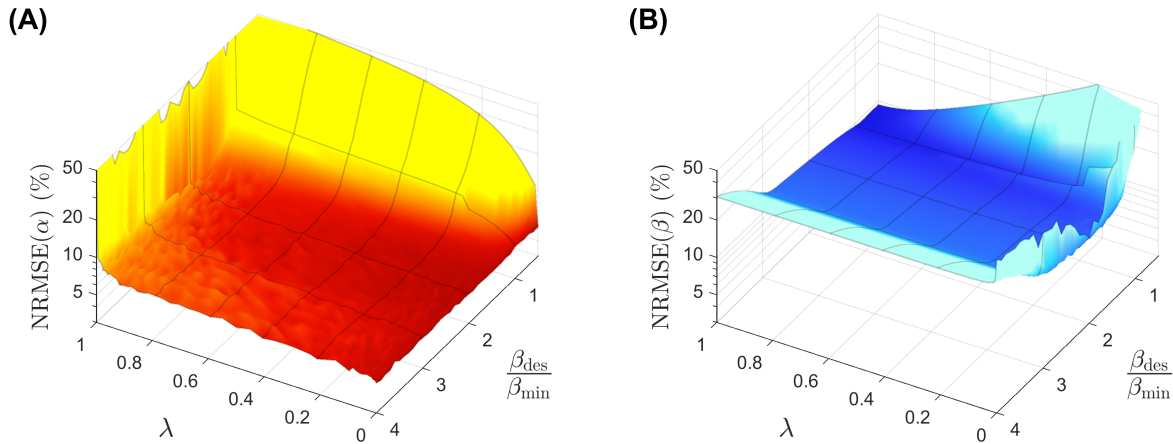

Supporting Information Figure S2: Surfaces of the two terms in the pulse design cost function: (A) NRMSE of the flip angle and (B) NRMSE of the  $B_1^{\text{rms}}$ , for all optimized values of  $\lambda$  and  $\beta_{\text{des}}$ .

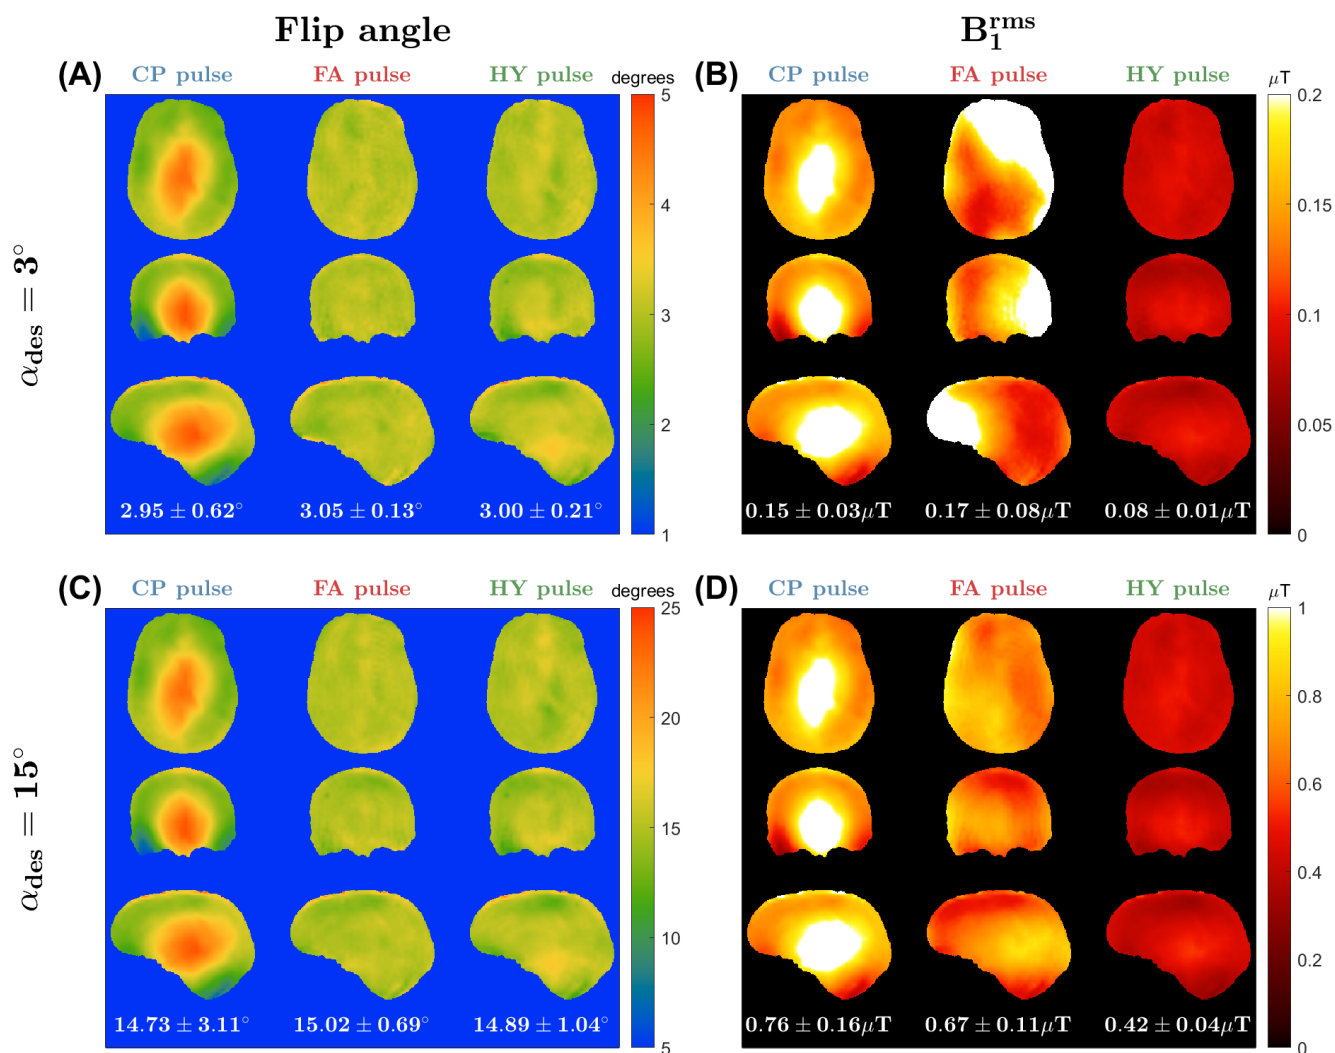

Supporting Information Figure S3: Flip angle (left column) and  $B_1^{\text{rms}}$  (right column) maps of each pulse type (CP, FA optimized, HY optimized) for the two SPGRs acquired to estimate the  $\hat{R}_1$  map in Figure 5. Top and bottom rows correspond to the SPGRs acquired with  $\alpha_{des} = 3^\circ$  and  $\alpha_{des} = 15^\circ$ , respectively.

Supporting Information Figure S4: Sagittal view of the  $\hat{R}_1$  maps acquired with CP, FA and HY pulses (top, middle and bottom rows respectively) for all subjects (left to right: subject A, B, C, D, E and F). To navigate through different slices this document needs to be open on a JavaScript-supporting PDF viewer, such as Adobe Acrobat Reader.

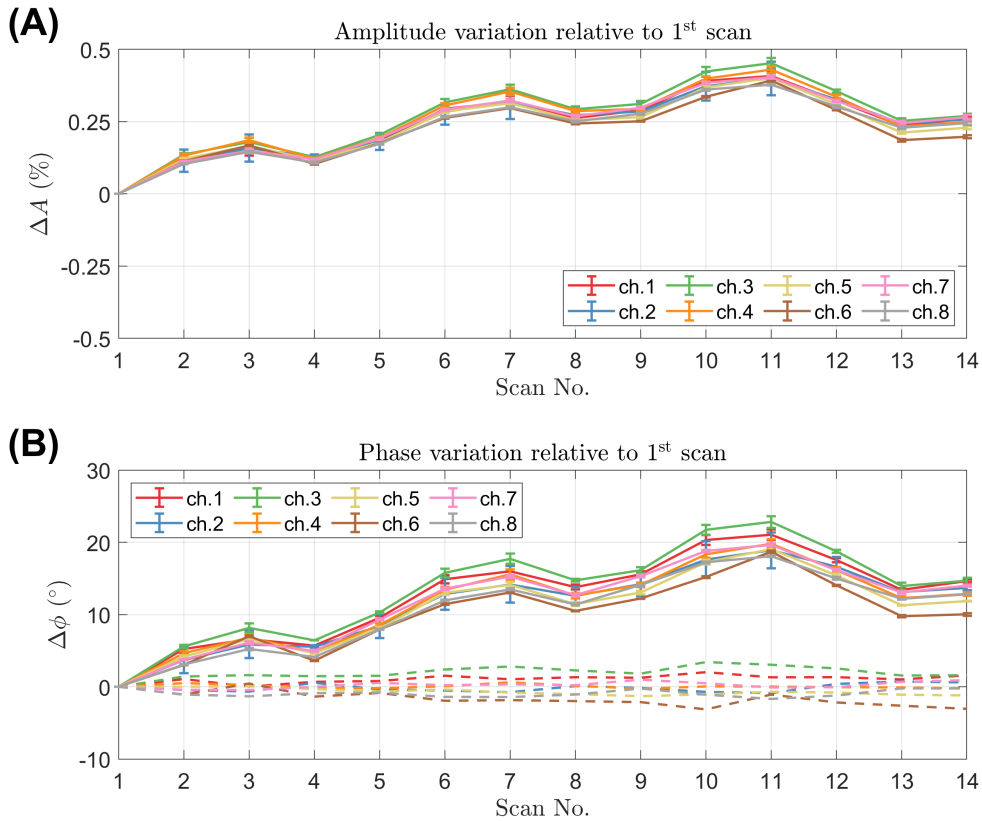

Supporting Information Figure S5: Variation of the (A) amplitude and (B) phase of the 5 sub-pulses in the same  $k_T$ -points pulse over time relative to the 1<sup>st</sup> scan, where the traces were measured using the directional couplers (DICOs). The bar range for each point represents the standard deviation across the 5 sub-pulses. The dashed lines in (B) represent the phase drift with respect to the average of all channels.

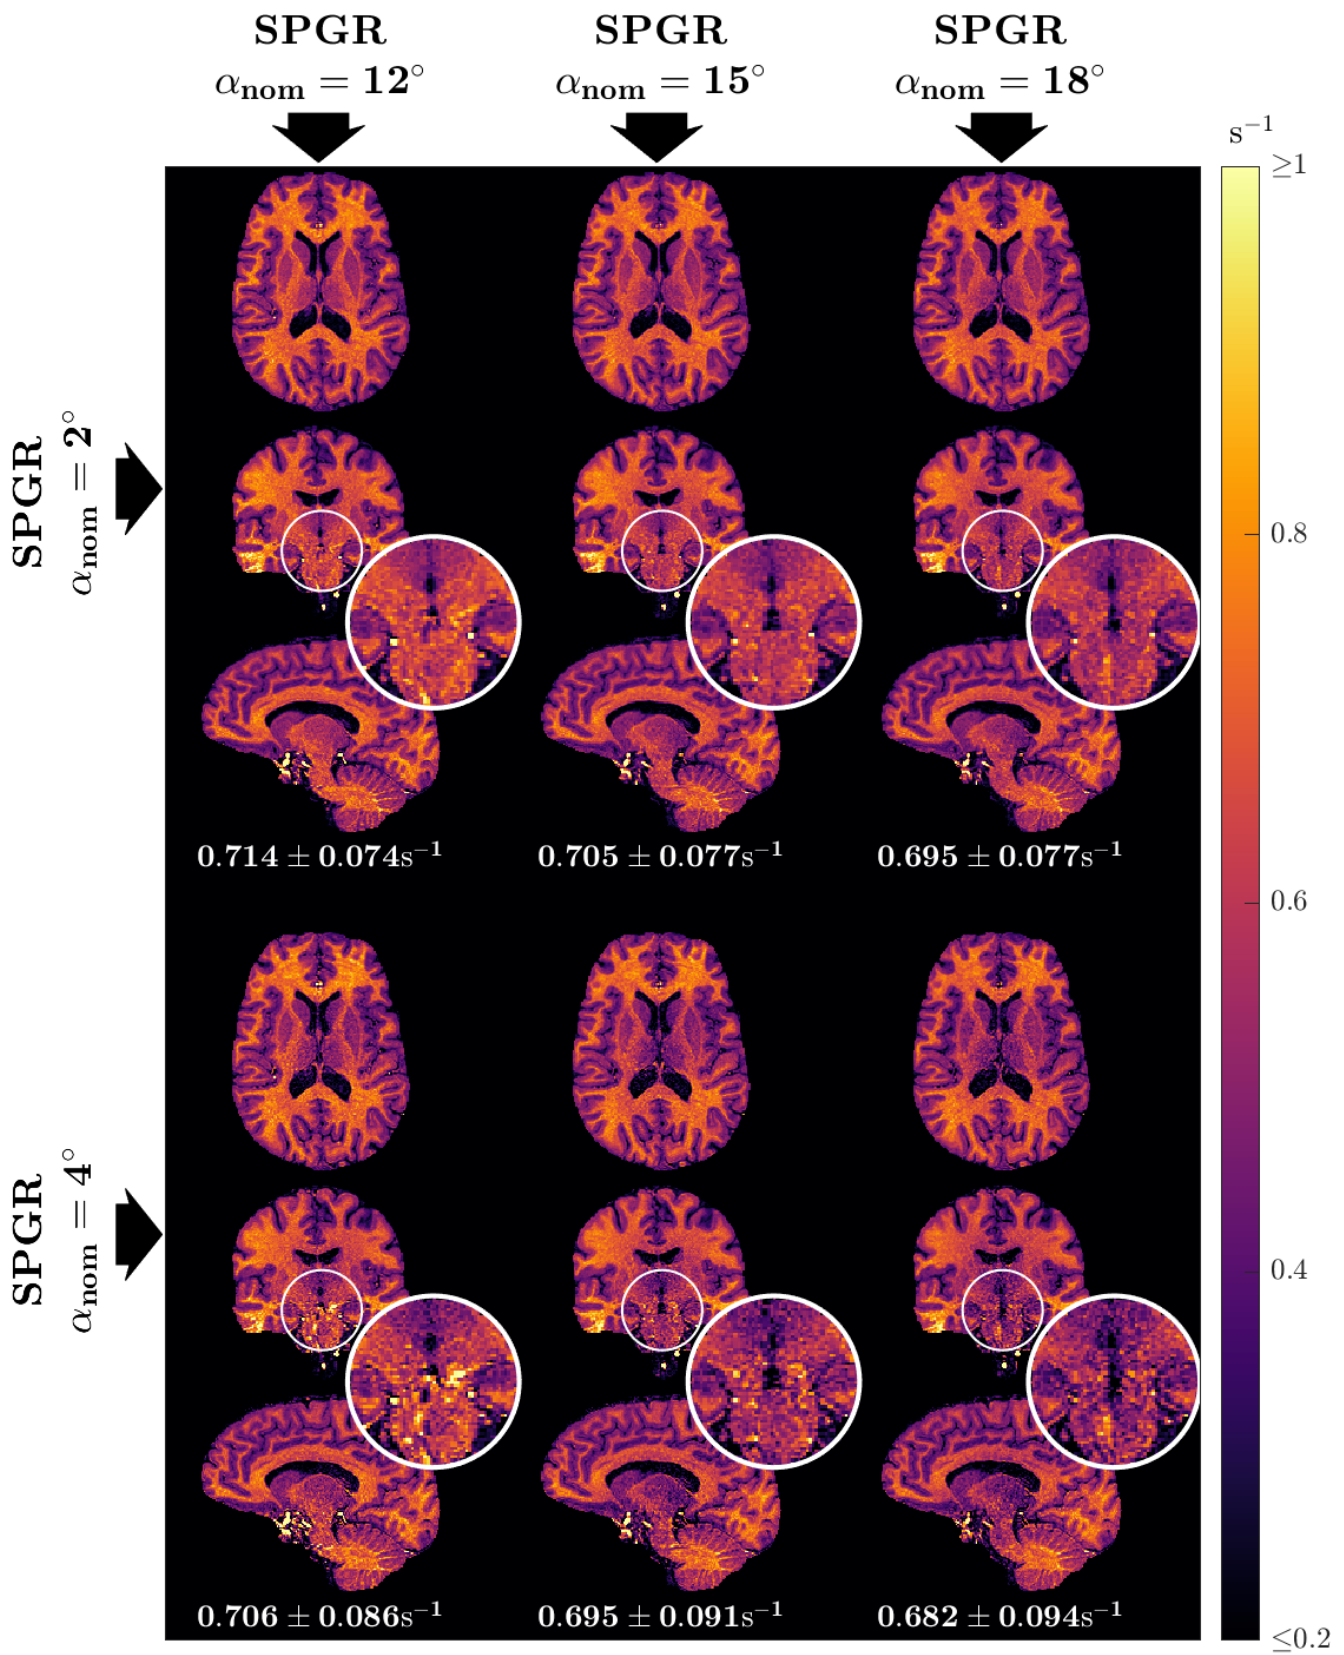

Supplement: MRM-93-1090-s001.pdf [file MRM-93-1090-s001.pdf]
